# Supplementary material
Source: PubMed Central journal article supplement (PMC8531986)

**Disclosure Purpose:** 21-10737

Summary of Interests

**Company or Organization**

| Entity | Type             | Interest Held By |
|--------|------------------|------------------|
| Pfizer | Grant / Contract | Self             |

*Recipient Name:* Clalit Research Institute  
*Grant / Contract Description:* Institutional grants to Clalit Research Institute from Pfizer outside the submitted work

*Recipient Type:* Institution  
*Grant / Contract Purpose:* Research  
*Additional Information:* Institutional grants to Clalit Research Institute from Pfizer outside the submitted work and unrelated to Covid-19, with no direct or indirect personal benefits.

Additional Questions:

- Are there other relationships or activities that readers could perceive to have influenced, or that give the appearance of potentially influencing, what you wrote in the submitted work?**  
No.
- What is the manuscript title?**  
Suspected Myocarditis Following Nationwide Mass Vaccination for COVID-19
- Are you the corresponding author?**  
No.

Certification

I certify that the information provided in this disclosure is complete and accurate.

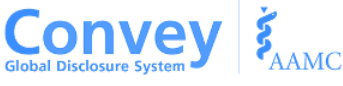

**Disclosure Purpose:** 21-10737

## Summary of Interests

I do not have any interests to disclose at this time.

## Additional Questions:

1. **Are there other relationships or activities that readers could perceive to have influenced, or that give the appearance of potentially influencing, what you wrote in the submitted work?**  
No.
2. **What is the manuscript title?**  
Myocarditis following vaccination with the BNT162b2 mRNA Covid-19 Vaccine in a Nationwide Mass Vaccination Setting
3. **Are you the corresponding author?**  
No.

## Certification

I certify that the information provided in this disclosure is complete and accurate.

Disclosure Purpose: 21-10737

## Summary of Interests

### Company or Organization

| Entity                                                                                                                                                                                        | Type             | Interest Held By                                                                                                                                                          |
|-----------------------------------------------------------------------------------------------------------------------------------------------------------------------------------------------|------------------|---------------------------------------------------------------------------------------------------------------------------------------------------------------------------|
| Pfizer                                                                                                                                                                                        | Grant / Contract | Other - Institutional grants to Clalit Research Institute from Pfizer outside the submitted work and unrelated to COVID-19, with no direct or indirect personal benefits. |
| <i>Recipient Name:</i> Clalit Research Institute<br><i>Grant / Contract Description:</i> Institutional grants to Clalit Research Institute from Pfizer outside the submitted work and unrelat |                  | <i>Recipient Type:</i> Institution<br><i>Grant / Contract Purpose:</i> Research<br><i>Additional Information:</i>                                                         |

## Additional Questions:

- Are there other relationships or activities that readers could perceive to have influenced, or that give the appearance of potentially influencing, what you wrote in the submitted work?**  
No.
- What is the manuscript title?**  
Myocarditis following Vaccination with the BNT162b2 mRNA Covid-19 Vaccine in a Nationwide Mass Vaccination Setting
- Are you the corresponding author?**  
No.

## Certification

I certify that the information provided in this disclosure is complete and accurate.

Disclosure Purpose: 21-10737

Summary of Interests

**Company or Organization**

| Entity                                                                                                                                                                            | Type             | Interest Held By                                                                                                                                                                                                                                                                    |
|-----------------------------------------------------------------------------------------------------------------------------------------------------------------------------------|------------------|-------------------------------------------------------------------------------------------------------------------------------------------------------------------------------------------------------------------------------------------------------------------------------------|
| Pfizer                                                                                                                                                                            | Grant / Contract | Self                                                                                                                                                                                                                                                                                |
| <i>Recipient Name:</i> Clalit Research Institute<br><i>Grant / Contract Description:</i> Institutional grants to Clalit Research Institute from Pfizer outside the submitted work |                  | <i>Recipient Type:</i> Institution<br><i>Grant / Contract Purpose:</i> Research<br><i>Additional Information:</i> Institutional grants to Clalit Research Institute from Pfizer outside the submitted work and unrelated to COVID-19, with no direct or indirect personal benefits. |

Additional Questions:

- Are there other relationships or activities that readers could perceive to have influenced, or that give the appearance of potentially influencing, what you wrote in the submitted work?**  
No.
- What is the manuscript title?**  
Suspected Myocarditis Following Nationwide Mass Vaccination for COVID-19
- Are you the corresponding author?**  
No.

Certification

I certify that the information provided in this disclosure is complete and accurate.

Disclosure Purpose: 21-10737

## Summary of Interests

### Company or Organization

| Entity                                                                                                                                                                            | Type             | Interest Held By                                                                                                                                                                                                                                                                    |
|-----------------------------------------------------------------------------------------------------------------------------------------------------------------------------------|------------------|-------------------------------------------------------------------------------------------------------------------------------------------------------------------------------------------------------------------------------------------------------------------------------------|
| Pfizer                                                                                                                                                                            | Grant / Contract | Self                                                                                                                                                                                                                                                                                |
| <i>Recipient Name:</i> Clalit Research Institute<br><i>Grant / Contract Description:</i> Institutional grants to Clalit Research Institute from Pfizer outside the submitted work |                  | <i>Recipient Type:</i> Institution<br><i>Grant / Contract Purpose:</i> Research<br><i>Additional Information:</i> Institutional grants to Clalit Research Institute from Pfizer outside the submitted work and unrelated to COVID-19, with no direct or indirect personal benefits. |

## Additional Questions:

- Are there other relationships or activities that readers could perceive to have influenced, or that give the appearance of potentially influencing, what you wrote in the submitted work?**  
No.
- What is the manuscript title?**  
Myocarditis following vaccination with the BNT162b2 mRNA Covid-19 Vaccine in a Nationwide Mass Vaccination Setting
- Are you the corresponding author?**  
No.

## Certification

I certify that the information provided in this disclosure is complete and accurate.

**Disclosure Purpose:** 21-10737

**Summary of Interests**

I do not have any interests to disclose at this time.

**Additional Questions:**

- 1. **Are there other relationships or activities that readers could perceive to have influenced, or that give the appearance of potentially influencing, what you wrote in the submitted work?**  
No.
- 2. **What is the manuscript title?**  
Suspected Myocarditis Following Nationwide Mass Vaccination for COVID-19
- 3. **Are you the corresponding author?**  
No.

**Certification**

I certify that the information provided in this disclosure is complete and accurate.

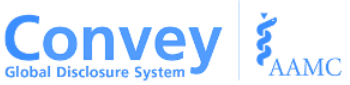

**Disclosure Purpose:** 21-10737

**Summary of Interests**

I do not have any interests to disclose at this time.

**Additional Questions:**

- Are there other relationships or activities that readers could perceive to have influenced, or that give the appearance of potentially influencing, what you wrote in the submitted work?**  
No.
- What is the manuscript title?**  
Myocarditis following vaccination with the BNT162b2 mRNA Covid-19 Vaccine in a Nationwide Mass Vaccination Setting
- Are you the corresponding author?**  
No.

**Certification**

I certify that the information provided in this disclosure is complete and accurate.

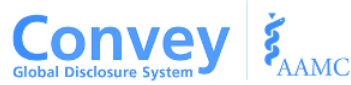

**Disclosure Purpose:** 21-10737

### Summary of Interests

I do not have any interests to disclose at this time.

### Additional Questions:

- Are there other relationships or activities that readers could perceive to have influenced, or that give the appearance of potentially influencing, what you wrote in the submitted work?**  
No.
- What is the manuscript title?**  
Myocarditis following vaccination with the BNT162b2 mRNA Covid-19 Vaccine in a Nationwide Mass Vaccination Setting
- Are you the corresponding author?**  
No.

### Certification

I certify that the information provided in this disclosure is complete and accurate.



**Disclosure Purpose:** 21-10737

**Summary of Interests**

I do not have any interests to disclose at this time.

**Additional Questions:**

- 1. **Are there other relationships or activities that readers could perceive to have influenced, or that give the appearance of potentially influencing, what you wrote in the submitted work?**  
No.
- 2. **What is the manuscript title?**  
Myocarditis following vaccination with the BNT162b2 mRNA Covid-19 Vaccine in a Nationwide Mass Vaccination Setting
- 3. **Are you the corresponding author?**  
No.

**Certification**

I certify that the information provided in this disclosure is complete and accurate.



**Disclosure Purpose:** 21-10737

**Summary of Interests**

I do not have any interests to disclose at this time.

**Additional Questions:**

- 1. **Are there other relationships or activities that readers could perceive to have influenced, or that give the appearance of potentially influencing, what you wrote in the submitted work?**  
No.
- 2. **What is the manuscript title?**  
Myocarditis following vaccination with the BNT162b2 mRNA Covid-19 Vaccine in a Nationwide Mass Vaccination Setting
- 3. **Are you the corresponding author?**  
No.

**Certification**

I certify that the information provided in this disclosure is complete and accurate.



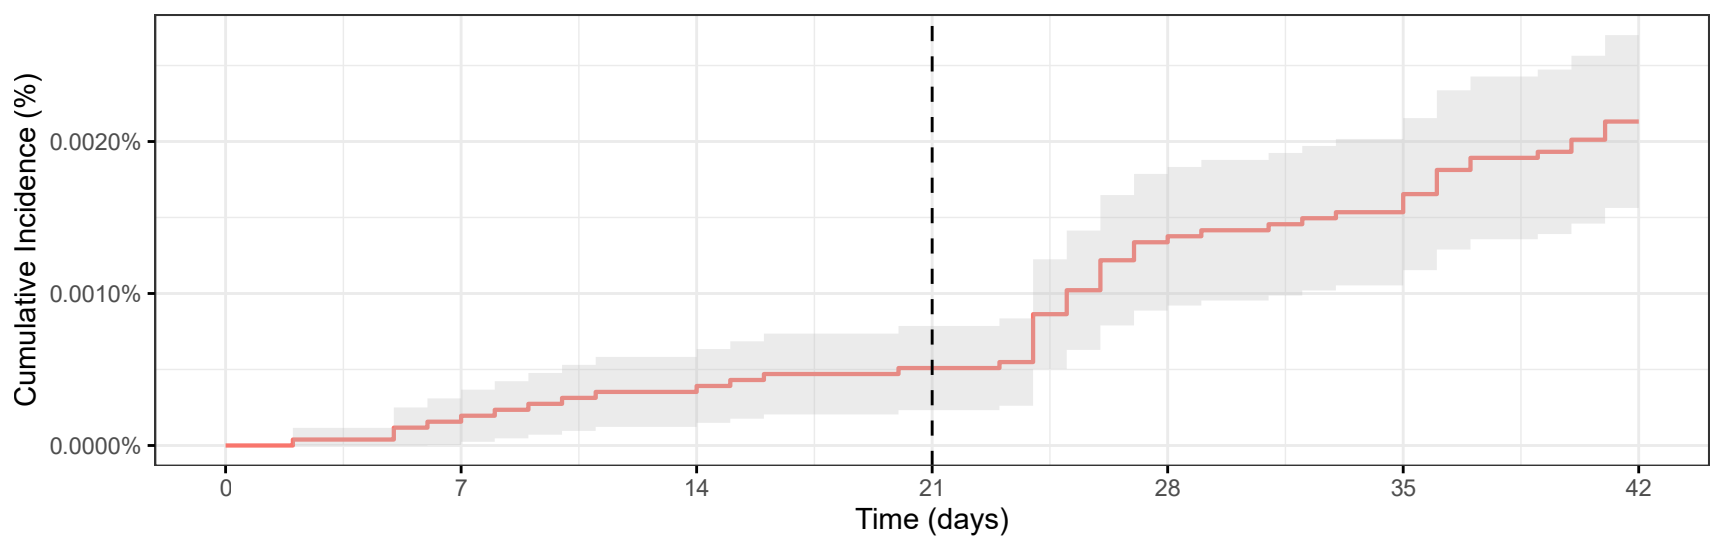

### Number at risk

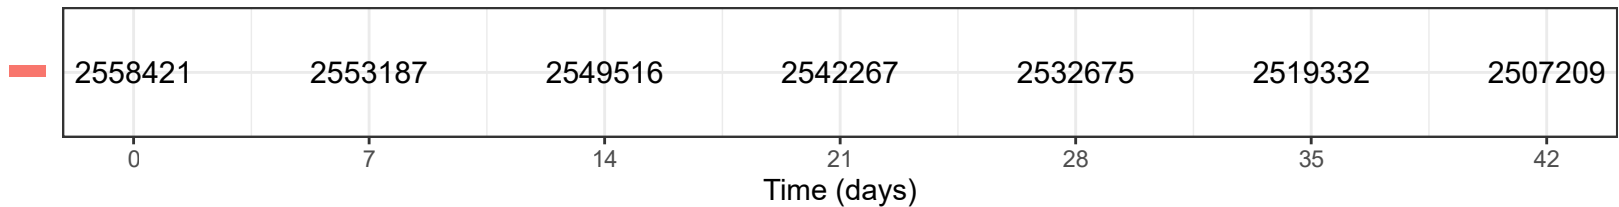

### Cumulative number of events

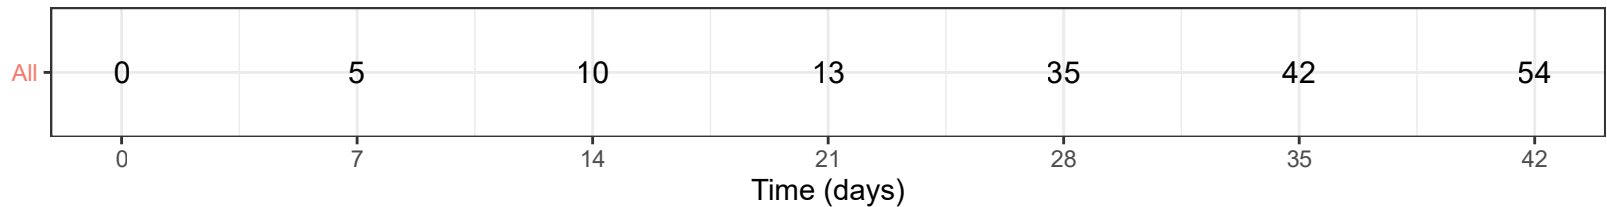

**Disclosure Purpose:** 21-10737

Summary of Interests

I do not have any interests to disclose at this time.

Additional Questions:

1. **Are there other relationships or activities that readers could perceive to have influenced, or that give the appearance of potentially influencing, what you wrote in the submitted work?**

No.

2. **What is the manuscript title?**

Suspected Myocarditis Following Nationwide Mass Vaccination for COVID-19

3. **Are you the corresponding author?**

Yes.

a. **Please list the other authors' names here.**

Noam Barda MD PhD, Sara Hoss MD, Ilan Richter MD MPH, Maya Wiessman MD, Yaron Aviv MD, Tzliil Grinberg MD, Oren Auster MSc, Noa Dagan MD PhD MPH Ran Balicer MD PhD MPH, Ran Kornowski MD.

Certification

I certify that the information provided in this disclosure is complete and accurate.

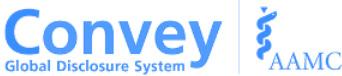

Supplement: NEJMoa2110737_disclosures.pdf [file NEJMoa2110737_disclosures.pdf]
